# Supplementary material for: Inhibition of the mevalonate pathway augments the activity of pitavastatin against ovarian cancer cells
Source: PubMed Central journal article supplement (PMC5556066; doi:10.1038/s41598-017-08649-9), 2017-08-14
Supplement: 41598_2017_8649_MOESM1_ESM.pdf [file 41598_2017_8649_MOESM1_ESM.pdf]

## Supplementary Information

### Inhibition of the mevalonate pathway augments the activity of pitavastatin against ovarian cancer cells

Marwan Ibrahim Abdullah, Mohammed Najim Abed and Alan Richardson

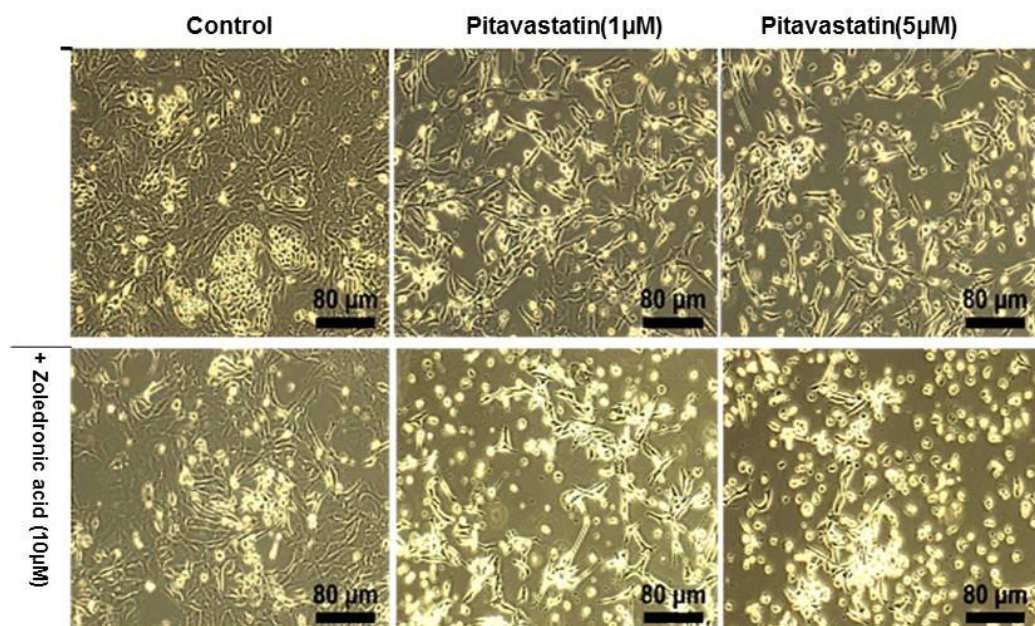

**Supplementary Figure 1.** Visualization of synergy between pitavastatin and zoledronic acid by phase contrast microscopy. Skov-3 cell line treated with indicated drug concentration for 72 hr were visualized by phase contrast light microscopy.
